# Supplementary material for: Profile and potential bioactivity of the miRNome and metabolome expressed in Malva sylvestris L. leaf and flower
Source: PubMed Central journal article supplement (PMC10507896; doi:10.1186/s12870-023-04434-1), 2023-09-19

Supplemental Material 3. Full-length version of the gel shown in Figure 2A.

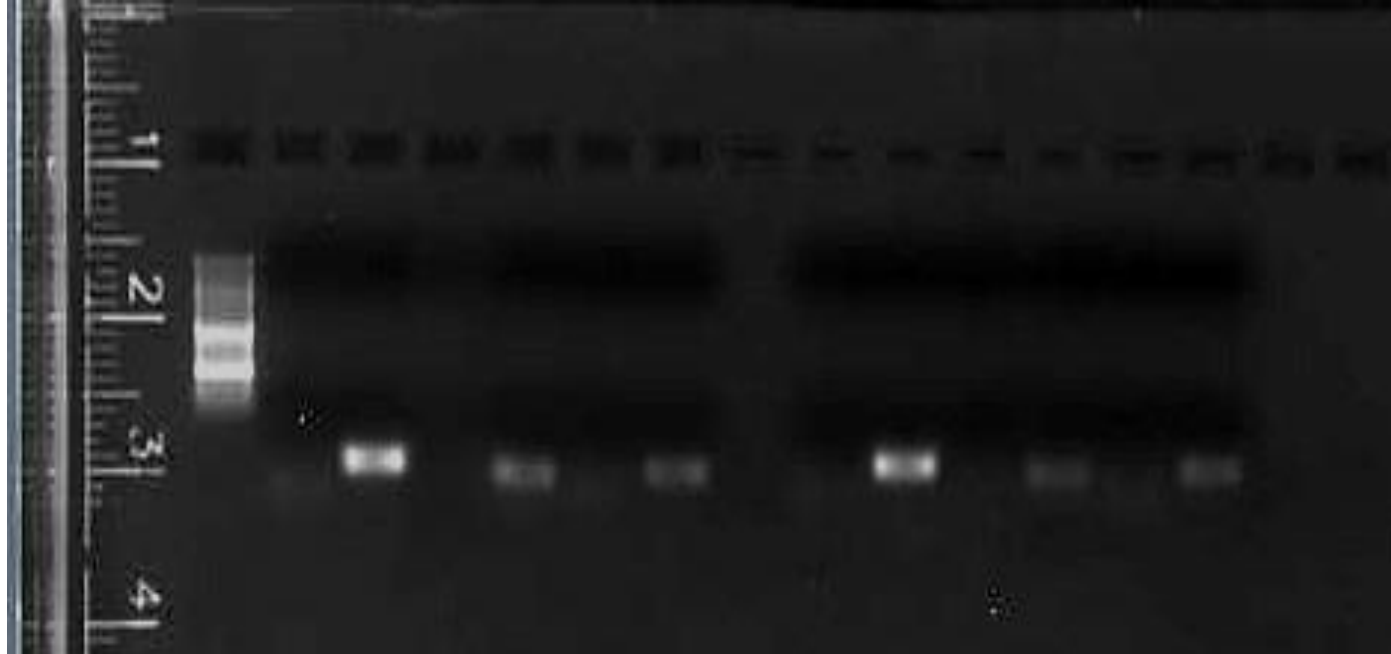

Supplement: 12870_2023_4434_MOESM3_ESM.pdf [file 12870_2023_4434_MOESM3_ESM.pdf]
